# Supplementary material for: Specific retention of the protostome-specific PsGEF may parallel with the evolution of mushroom bodies in insect and lophotrochozoan brains
Source: PubMed Central journal article supplement (PMC2684095; doi:10.1186/1741-7007-7-21), 2009-05-07
Supplement: 1741-7007-7-21-S1.pdf [file 1741-7007-7-21-S1.pdf]

>Short DmPsGEF

MPTMTRMHRHSSSSAVVEESRGRRRRGVGPVGVGDANKENFGVHFMSSPFGNASL I ALQDLSNVHGKSPQR  
RSFSEGSQPRQATPQLAALRCLPRTTGGVALEDSQLSSSRMGDTTLDRMLDA I I ESARKEVRCTKTLPG  
AGATTSTT I LADNAEWSETSVHEMEVRTPTHLKRQRVRRKNPHKTTT I NQTQSHQAKKLEPLQLVPSTK  
RCLSFSSSSASSDLDEDEQQVAKRSSLASPTTTPPSHCCTTTTSS I SSSSSSNGGADMEASQRGS I DVS I A  
FDAKEQQLNVHV I RCRDLQRSHGSGNGS I NAYVKVALSGBAQPYPGYGGHSSGGSMSSGYQRTAVHRHSGR  
PYFDQRNFQ I SSGEETAGQYLQLAVWHRDRHLKRSEFLGCSTFPLNELVHPDSGVSAGSYKLHAQACPP  
PTSRHSQPKANAGQDQKQETEAADQDQKQDDSPAEMAAAVTVTPQKPVATGSGSGSNSAAMALNDEV I S  
I S I DSMGKEDPLLQQPQQPMKLSKKALHQDADENLFLRFLELDPPADGNANSTTTQAQATGSQSSASK  
ANESNANHLNNGTSGGRRQSTMPNSGGSSVGGAVRQQGRTPFTMTKRLTRTEERGFQFS I VVTHPPRVE  
K I EAGLSADRCG I LPGDYV I FVDKHNVTMPEADVNL I RSQSSLTLE I FRRSGAGATT I TSTD LGQNN  
VH I STRLGAAVGLGSEEHTLATTATGTTTVMQLRTTSTR I QPLANSMSRPATACSGTTSS I EAAKRRLLH  
LPQVTFSEKVGKGVFV

>Long DmPsGEF

MPTMTRMHRHSSSSAVVEESRGRRRRGVGPVGVGDANKENFGVHFMSSPFGNASL I ALQDLSNVHGKSPQR  
RSFSEGSQPRQATPQLAALRCLPRTTGGVALEDSQLSSSRMGDTTLDRMLDA I I ESARKEVRCTKTLPG  
AGATTSTT I LADNAEWSETSVHEMEVRTPTHLKRQRVRRKNPHKTTT I NQTQSHQAKKLEPLQLVPSTK  
RCLSFSSSSASSDLDEDEQQVAKRSSLASPTTTPPSHCCTTTTSS I SSSSSSNGGADMEASQRGS I DVS I A  
FDAKEQQLNVHV I RCRDLQRSHGSGNGS I NAYVKVALSGBAQPYPGYGGHSSGGSMSSGYQRTAVHRHSGR  
PYFDQRNFQ I SSGEETAGQYLQLAVWHRDRHLKRSEFLGCSTFPLNELVHPDSGVSAGSYKLHAQACPP  
PTSRHSQPKANAGQDQKQETEAADQDQKQDDSPAEMAAAVTVTPQKPVATGSGSGSNSAAMALNDEV I S  
I S I DSMGKEDPLLQQPQQPMKLSKKALHQDADENLFLRFLELDPPADGNANSTTTQAQATGSQSSASK  
ANESNANHLNNGTSGGRRQSTMPNSGGSSVGGAVRQQGRTPFTMTKRLTRTEERGFQFS I VVTHPPRVE  
K I EAGLSADRCG I LPGDYV I FVDKHNVTMPEADVNL I RSQSSLTLE I FRRSGAGATT I TSTD LGQNN  
VH I STRLGAAVGLGSEEHTLATTATGTTTVMQLRTTSTR I QPLANSMSRPATACSGTTSS I EAAKRRLLH  
LPQVTFSEKES I VPVTDNRRRFLQL I SREQNFTAALHFGVDRFVQPLGERKDL I SPNDHRTLFQNI DELL  
R I AED I LEQLCSSDQQDQEPQMNFAASRVYLSKTTA I CAAYKCYCNG I KRADCVLVNKSRQTGSEF I AFIT  
EPAVPRKRPDLMF I HRPLQHFRE I LKLMQLLAGNCHVDTEEHKNFSTV I NELQAAYRE I TVSSGLMEPL  
GEGRPLLTLQDLESRMVFTKCKPFTLAVQGRQW I FGGDLRVEGRSVKPYWTLFSD I I VFAKVSRRDVL  
F I TEEP I P I ANVVDSCFHMRRKKTTEFRLTVDPNGRLAESPTGYCAPDLTRTPKRGARRKSL I LRAPSLEL  
KAVWQNLQRQ I FLVNAALGSTPLSSPLDSPDLNLTLPVLS I GLTTASMGSMKLPPLDS I HLKQQKQKQ  
VRLFRSKRLDSGDSYENLQRLASAVRHHCATTTSSATQTQSHQPPLCTTSLPSRTNSPARNQRHPNGQ  
GHVGGVSPNGVGGVSFGGCNTNSSCLSSSASLTQTQTQVHTQTLNHSQTHSQTQTSVLSLSSCKCLTV I P  
EVTSEPPVNQHASQKLEFSLSSVGRSF I DESGGVVGQVSLTTPETPTPN I SPTTSQPCNSDAFNSDFV  
ATSTTGKGN I PLAIEFGGSWDLLELDLQLHEVNLDPSTYDTEVEEC I FLGDEEDREGTEGHGHEDESDDED  
SVVVDPPFGMLPTRPTPPDSL

>TcPsGEF

MR I RKYVGLLLQAKKEKFL I I PEPAGSVVKEQKSRAPEC I LEHQVEQ I VKNRANVEETFLPFQTRTMLK  
WTVMARREADKSDALRRPTADASTSETTPKSNKTKRRHSSGHRRSGGRRSSLGLEMDKENQFTSTP I KSF  
EDHHQFDALRDVSNLTPNRRVLSAKKCRRSASPSSHRKHKKKKLCLNPSHRKEFGEGKNYFRPFETVDSH

IEGLVLDKDLSGELRVKRR IQDTYAPTLPTFTTEYSPCFMRDAHCLYNFTPATPLGKYLALDQDTPHP  
SKKPK I DHVSDFLHQ I NF I TSPEDDKLTCPTMESKSTLTLREESKVSPLVKKLVDLRFSQLSCDKDTCKN  
NSSL I NDLSLDQ I VDA I LNSSAESAANKENESNETHEENL I NTENERHVATSFDRCSSDSGFKSSTTEYS  
HQLEGNFQCKCKTSTPNAALCDKT I I N I NETFNERCVDV I NPRKRPSSTPNDDNNAKRAYLDKSEEDNVY  
CTLKRQRC I RRRRTDDEKKMSAKKSRKVDEP I I GDEFDSN I SGK I AEDNSTPLNETFTLLTPVDNSRRF  
RRCLLFESPTSLSESASTTNSSLRDVRGTMDLN I RCENDELYAN I I RCKDLYRPNQKQ I NAYVKVALSDR  
LGDNRKRNG I LQRTAVQADSSKPFNHTFKFPLQKESLQKRLH I EVWHRDRSSRTSEFLGCMFSFDVRHV  
YTKD I SGSYRLLPQSSGRCQNIPI I SVEPLDREAEDCQPI I MCESQSSVDE I MSLDGLDNDLKKATNKA I L  
SEQQKYADENLFLRYLELDPTEGPEA I PAAMQRKATGNKNGRTPFTQTKKLTRAPKSGFGFSVWTHPPR  
I ERVEKGLPAEKAG I LPGDY I I FVDKHNVMPE I D I LNL I RSYGSQTLTLE I FRRNAAKNGSVPSVRRLN  
STGTCSTTGLPI I SSNLVQRRPSTVCSTNTASVDYNNRKLHLPQVTFSAEKASNNQEENRTKAMYQL I HKE  
QQYATGLQFAVTRFVSALAERRDL I TPSEHK I LFQNSEE I LRVTED I LDNLVHEEGVHNL I RTYHAKLNE  
I TAAYRRYCSG I KKADCVLANKTKNSNSEFVRFLLHTPS I PRRRPDI I TAF I HKPLEHYREVLKAFIV I QSH  
TKPNHEDYPV I NQLVHDLQHTYRE I TVEAGLMEPMGEGRPLLSVQDLENRLVFTKCKPFVLNKPGRQW I F  
GGDLGRVEGRNVRQYWTLLFSDLLLFAKVSRRDRVLF I I EDPLPLAH I TDMFFNVRKKVDSGLLDTEFR I T  
VTPGGRLASSPTVHCGPDLRSRTPKKNTGKRTV I LRAPTELKAVWQNLQRQM

>PhcPsGEF

MHVHERNSRGSVRKVALVPSAERTFFRTPVHRESSCPNFNETFSFNFHSEDLNKH I LVSVWHRDRDRNRKS  
EFLGCVSLAVKNA I KKE I SGWFRLVAQSGGSKSSSNQQRPI I QSNCGLSTTGSPSMMAHRSGNQKFDL I P  
FDDEPRSSPPDKHNNKYS I KKKLNDDSSFLRHLELEP I DGEGRVPLPEA I AKGGRTPTTTTKQLTKQPG  
GGFGFS I AWWQPPRVERVEAGQPADRAG I RPDGFV I FVDRFNVVTMSEEE I LD I I KSCGNELTLE I YRKS  
NANGCLVEPP I ALPSTMQTSVEYNNSSRWSGTCYAPTGTNTTTTTTTTTSTSFDFAKRRLHLPQVAFTNEV  
STLNPEESRKA I YQLLSKEQNYATNLQFG I NRFSVPLLERKEF I NQKQHQ I LFQNI EE I LRLTEDTLEQ  
A I NEEVDLTGDS I GRLYFKR I QVLKPAYRRYCSG I KRADCVLAEKFKNNEFNRFCAEPPVPRKRPDLTTF  
LHKPLEHYRELLKHLQ I I FNLTKSPDTHAALSRVNDMQSSSFREVTGGLMEPEVEGRPLLSVQDLESRL  
VFTRCKPFVLS I PGRQW I FGGDLSK I EGRTVHPFWALLFTDMM I FAKVSRRDRVLF I TEEPLSLLAVSQAF  
FN I RKKANEFRLLSNNSPGMDSPANSTTCGPD I VLSRTPKKNTKFKS I ALRAPTELKAVWQNL I QRQ I  
I HLNTRGLTPSTSPLESPDPPTT I SAATLDT I SLKRQMLRPQVYSCSPNHVPRDDEDETSSPPPEKFY  
EPLLT PDSATTFG

>AmPsGEF

MVN I PTAGNRETPTSTFKPGDHGASTWGEWSGRGLLGSGHGTRVGVHVRVQYTDKMLKWTVSRSLASASS  
TPHGPPNLNKAPRRPFRDLSNTPPAAGTKARG I PGQNVEN I SARTTPVRRRRCRSHGSDMRAYFQATKPN  
LRASKRQSMSQQQTEKSSSEFYQGTPRVAD I GPLTFLPQGGRCPTALTLPDPALEFMRKTRVAKNFPTD  
NELPQN I VNEARANLQSHVSDFFQ I SMATSPEDVMEAESVPFSMARPI I YPRSLNEEGGRKTSEGTRMPY  
LPKLAK I TR I HSRCRTPYHGKLAPSAAAAGKGGHTPLLGLKSSLA I DQDLPKFENMDNTVTEVLNREQEVN  
FTGKTVAE I LLGDVEERKKVLGGSRGGEEENSTMKT DHTYET I AEREETAMEEEGGSCHNDSSVSSASQL  
LEDPSPMSWAFASPTNDLDGEFTLKRQGI I RKRHRKDTDKPLDGKRAKRRSTSRSPSAKTKEAQTLL  
AEAVNRNVKKLALETDLDTLLGDEKFEKALFCGLEGRGREGGRKTNTWDLDSPKSTLTDFFHSSKSYLN  
SVTNTPETPLVATVRRCLKFSPETAEP RP NCHGS I E I EYSVVADQ I HVRV I RCKDLRRAYEGPVHAYVK  
ASLKNTNGEGVVKRTAVHRATPNPVFHETL I LPCPVNNNHCSSKPTSLDI I AVWHRDRRARRSELLGCMTL

PLPLSQDKEATWHPLEAGTGRNTSTPYVGLPQDCG I SPPLSKDGESDNNNSGGEDLTYLRHLELEP I DPL  
TGLPLHPGFTAKGGRTPTVTRRL I RQTANQ I PWGFSLSWGRRPRVERVDPGSPAERSGLRPGDHVVFVD  
MTNVVTRSREE I LGL I QAATNQL I LEVYRKGNVHSSMHRPNMNVSLQQS I GGGHHAVAFNAEVGTGVLV  
FPNLAPDAPPEEELSVREARYWG I LKSGHTRFMAPLAERRDVLSAADYL I LFQNLDELLK I SEE I RDEGG  
GVESYLCRVPR I TAAYRRYL SGLQRACLLVALRRNTAFAKLVCEPAVPHKRRPDLTGVL LPLEHYREM  
TRLLSLASPRNCQQARDLAQGYREATANAGVMEPPRDTGRPLLSLQEVESRLVFARCKPFTLAMPGRQWL  
FGGALAKVEGRARLQPSWALLLTDLLVFARVSRDRVLFVTEEPLRLSN I AEACFTVRKRPTFRLQ I A I N  
PAGNSENGHVEVSNSGGCSPHSRPRRRVMVLRAPTPELKAVVHNLLQRQM

>LgPsGEF

MV I DLSESTRKKYTTSGQLKVSAYMNFGLLTVHVQGRNFSSSWKPLCDSY I KMSLVPDESKRTRCKTAS  
I LNTNPLFDDKFSFE I LEEDHNKRL I SVWHKDQKSGLSEFLGCM SFGVKHLMNPKEVNGWYLLTEE  
I GRKKHLQ I TKTQKPALKTNTQSN I PQ I NKDVKGSEPTTVMMYRGKNGFGFSVVEFPVKVGRVDGASPA  
EEAGL I QGDT I VKVNGQNVSRSTAVSVAKLVKRSSNKLVL DVQR I TENSTNNTYEKP I RHNNSPEP I YES  
I NSYASYP SQDLSTDGD I SREM I RDSE I SVDTDNAFLDDPEEFMPTSTPLPLLCNGHRTVTSVNEQRKQ  
EAVHRLLSLELDF I DFMHAGVQRYSRPLRHC I LAAQQHSSLFQNVKLV T I SEYHV KMQMDNSPSFYSDA  
DDTQSSDG HFFHV MGL I YQSKLHMLCQAYE I YANGLSNANAVLSDLKRNPDFVRFVKEPVL TQGVPS I SA  
F I YRP I QHLKELQQCLQD I FNNTSTDSEDF I TLKNVVEGLQESVNNMTCSTRVHSLNSLSSKR SKGSAG  
SLGSSGSSSGSGSMKYGSSSSGSSSSNKVPNSCSMQTVRSVDAEVMK I QDRLVFDTN I PVFQLCQEERHL  
I YRGDTFKWEGQQWVK I HMLLFSDVLLQVEKDRSGFMKV I EEPLFLRE I CGVEANRKHATEFLLHTCPRS  
PCTGLPAPRRLVFCASTTEEKCVWKNLLEQRVHN I RGT I TQYSSTSSDNS I SSV I V
