# Supplementary material for: Specific retention of the protostome-specific PsGEF may parallel with the evolution of mushroom bodies in insect and lophotrochozoan brains
Source: PubMed Central journal article supplement (PMC2684095; doi:10.1186/1741-7007-7-21), 2009-05-07
Supplement: 1741-7007-7-21-S2.pdf [file 1741-7007-7-21-S2.pdf]

DmPsGEF RGSIDVSI AFDAKEQQLNVHV I RCRDLQRSHGSGNGS I NAYVKVALS GGAQPPGYGGHSSGGSMSSGYQRTAVHRHSGRPYFDQRFNFQ I SSG---EETAGQYL  
TcPsGEF -----LYANI I RCKDLYRPNKG---Q I NAYVKVALSDRLG-----DNRKRNG I LQRTAVQADSSKPFNFHTFKFPLQ-----KESLQKRL  
PhcPsGEF -----KVALVPSAER-----TFFRTPVHRESSCPNFNETFSFNFS-----EDLNKHI  
AmPsGEF ---S I E I EYSVVADQ I HVRV I RCKDLRRAYEG---PVHAYVKASLKNTNG-----EGVVKRTAVHRATPNPVFHETL I LPCPVNNHHCSSKPTSL  
LgPsGEF ---QLKVSAYMNFGLLTVHVQGRNFSSSWKP---LCDSY I KMSLVPDES-----KRTRCKTAS I LNTNPLFDDKFSFE I LE-----EDHNKRL  
: : : \* : \* \* . : : . : :

DmPsGEF QLAVWHRDRHLKRSEFLGCGSTFPLNELVHPD SGVSAGSYKLHAQACPPPTSRSRHSQPKANAGQDQKQETEAADQDQKQDDSPAEMAAAVTVPQKPVATGSGSG  
TcPsGEF H I EVWHRDRSSRTSEFLGCMDFVRHVYTKD I SG-----SYRLLPQSSGRCQN I P I SVEPLDREAEEDCQ P I MCESSQSSVDE I MSLDG-----  
PhcPsGEF LVSVWHRDRDRNRKSEFLGCVSLAVKNA I KKE I SG-----WFRLVAQSGGSKSSSNQRP I QSNCLSTTGSPSMMAHRSNGKQKFDL I PFDD-----  
AmPsGEF D I AVWHRDRRARRSELLGCMTLPLPLSQDKEATW-----HPLEAGTGRNTSTPYVGLPQDCG-----  
LgPsGEF L I SVWHKDKQKSGLSEFLGCMDFGVKHLMPKKEVN-----  
: \* \* \* : \* : \* \* : : :

DmPsGEF SNSAAMALNDEVI S I S I DMSGKEDPLLQQPQQPMKLSKKALHQRDADENLFLRFLELDPPADGNANSTTTQAQATGSSASKANESNANHLNNGTSGGRRQ  
TcPsGEF -----LDNDLKKATNKA I LSEQQKYADENLFLRYLELDPTGPEA I PAAMQRKATGNKN-----  
PhcPsGEF -----EPRSSPPDKHNNKYS I KKKLNDSSFLRHLELEP I DGEGRVPLPEA I AKGGRT-----  
AmPsGEF -----I SPPLSKDGESDNNSSGGEDLTYLRHLELEP I DPLTGLPLHPGFTAKGGRT-----  
LgPsGEF -----GWYLLTEE I GRKKHLQ I TKTQKPAKLTNTQSN I PQ I NKDVK-----  
: : : \* : : :

DmPsGEF TMPNSGSSVGGAVRQQQGRTPFTMTKR LTRTEE--RGFGFS I VVTHPPRVEK I EAGLSADRCG I LPGDYV I FVDKHNVTMPPEADVNL I RSQGSSTLE I FR  
TcPsGEF -----GRTPFTQTKK LTRAPK--SGFGFSVVVTHPPR I ERVEKGLPAEKAG I LPGDY I I FVDKHNVMMP E I D I LNL I RSYGSQTLTLE I FR  
PhcPsGEF -----PFTTTKQLTKQPG--GGFGFS I AWVQPPRVERVEAGQPADRAG I RPDGFV I FVDRFNVTMSEEE I LD I I KSCGNELTLE I YR  
AmPsGEF -----PCTVTRRL I RQTANQ I PWGFSLSWGRPPRVERVDPGSPAERSGLRPGDHVVFVDMTNVVTSRREE I LGL I QAATNQL I LEVYR  
LgPsGEF -----GSEPTTVMYRGNK--GGFGFSVVESFPVKVGRVDGASPAEEAGL I QGDT I VKVNGQNSRSTAVSVAKLVKRSSNKLVLVDVQR  
\* \* : : \* \* : \* : : : \* : \* : \* : \* : \* : \* : \* : \* : \* : \*

DmPsGEF RSGAGATT I TSTDLGQNNVH I STRLGAAVGLGSEEHTLATTATGTTVMSLQRTTSTR I QPLANSMSRPATACSGTTSS I EAAKRRHLHPQVTF SKES I VPVTD  
TcPsGEF RNAAKNGSVSPVRR-----LNSTGTCTTGLP I SSNLVQ-----RRPSTVCSTNTASVDYNNRKLHLPQVTFSAEKASNQE  
PhcPsGEF KSNANGCLVEPPIALP-----STMQTSVEYNNSSRWSTGTCYAPTGTNTTTTTTSTSFDAKRRHLHPQVAFTEVSTLNPE  
AmPsGEF KGNVHS-----SMHRPNSMNVSLQQS I GGGHHAFAFNAEVTG I VLVPNL  
LgPsGEF I TENSTNNTYEKPI RHNNSP-----EPI YES I NSYASYPSQDL DSTDGD I SREM I RDSE I SVDTDNAFLDDPEEFMPTSTPLPLLCNGHRTVTSVNE  
: : : : :

DmPsGEF -NRRRFLQL I SREQNFTAALHFQVDRFVQPLGERKDL I SPNDHRTL FQNI DELLR I AED I LEQLCSSDQQDQEPQ-----MNFASRVYLSKTTA I CA  
TcPsGEF ENRTKAMYQL I HKEQYATGLQFAVTRFVSALAERRDL I TPSEHK I LFNQSEE I LRVTED I LDNLVHEEG-----VHNL I RTYHAKLNE I TAA  
PhcPsGEF ESRKKA I YQLLSKEQNYATNLQFG I NRSVPLLERKEF I NQKQHQ I LFNQ I EE I LRLTEDTLEQA I NEEVDLTG-----DS I GRLYFKR I QVLKPA  
AmPsGEF APDAPPEEELSVREARYWG I LKSGHTRFMAPLAERRDVL SAADYL I LFNQLDELK I SEE I RDEGGGVES-----YLCRVPR I TAA  
LgPsGEF QRKQEA VHRLLSLELDF I DFMHAGVQRYSRPLR--HC I LAAQQHSSLFQNVKLV I SEYHVQMQDQNSPSFYSDADDTQSSDGHFFHVMGL I YQSKLHMLCQA  
. \* \* : : . \* : \* : : : \* \* : : : \* : : : \* : : \* : : \*

DmPsGEF YKCYCNG I KRADCVLNKSRTGSEF I AF I TEPAVPRKR -PDLTMF I HRPLQHFRRERK -PDLTMF I HRPLQHFRE I LKMLQLLAGNCHVDTEEHKNFSTV I NE  
TcPsGEF YRRYCSG I KKADCVLANKTKNSSEFVRFHLTPS I PRRR -PD I TAF I HKPLEHYRERRR -PD I TAF I HKPLEHYREV LKAFVT I QSHTKPNHEDYPV I INQLVHD  
PhcPsGEF YRRYCSG I KRADCVLAEKFKN--NEFNRFCAEPPVPRKR -PDLTFLHKPLEHYRERK -PDLTFLHKPLEHYRELLKHLQ I FNLTKSPDTHAALS RVND  
AmPsGEF YRRYLSGLQRACLLVALRRN--TAFAKLVCEPAVPHKRRPDLTGVL LPLEHYREHKRRPDLTGVL LPLEHYRETRLLSLAS-----PRNCQQARD  
LgPsGEF YE I YANGLSNANAVLSDLKRN--PDFVRFVKEPVL TQGV -PS I SAF I YRP I QHLKEQGV -PS I SAF I YRP I QHLKELQQLQD I FNNTSTDSEDF I TLKNVVEG  
\* . \* \* . \* . \* : : \* : \* : : \* : : : \* : \* : \* : \* : \* : \* : \* : \* : \* : \*

DmPsGEF LQAAYRE I TVSSGLMEPLGEG---RPLLTLQDLESRMVFTKCKPFTLAVQGRQW I FGG-----DLSRVEGRS -VKPYWTLFSD I I VFAKVSRRDRLF I T  
TcPsGEF LQHTYRE I TVEAGLMEPMGEG---RPLLSVQDLENRLVFTKCKPFV LNKPGRQW I FGG-----DLGRVEGRN -VRQYWTLLFSDLLFAKVSRRDRLF I I  
PhcPsGEF MQSSFREVTG--GLMEPEVEG---RPLLSVQDLESRLVFTRCKPFVLS I PGRQW I FGG-----DLSK I EGRT -VHPFWALLFTDMM I FAKVSRRDRLF I T  
AmPsGEF LAQGYREATANAGVMEPPRDTG--RPLLSLQEVESRLVFARCKPFTLAMPGRQW LFGG-----ALAKVEGRARLQPSWALLLTDLLVFARVSRRDRLFV T  
LgPsGEF LQESVNMTNCTRVHSLNLSKRSKGSAGLSGSSGSSGSGSMKYGSSSSGSSSNKVPNSCSMQTVRSVDAEVMK I QDRLVFDTN I PVFQLCQEERHL I YR  
: : : \* : : . \* : : : : : : : : : : : : : : : \* : : \* : \*

DmPsGEF EEP I P I AN-----VVDSCFHMRKKT-----TEFRLTVPNGRLAESPTGYCAP----DLTRTPKRGARRKSL I LRAPSLELKA VWNQLLQ RQ I  
TcPsGEF EDPLPLAH-----I TDMFFNVRKKVDGSLLDTEFR I TVTPGGRASSPTVHCGP----DLSRTPKKN TGKRTV I LRAPTELKAVWNQLLQ RQ M  
PhcPsGEF EEP LSLLA-----VSQAFFN I RKKAN-----EFRLLSNNSP GMDSPANSTTCGPD I VLSRTPKKN TFKFS I ALRAPTELKAVWNQL I QRQ I  
AmPsGEF EEP LRLSN-----I AEACTVRRKPT-----EFRLQ I A I NPAGNSENGHVEVSN--SGGCSPHSRPRRRVMVLRAPTELKAVWNQLLQ R--  
LgPsGEF GDTFKWEGQQVWK I HMLLFSDVLLQVEKDRSGFMKV I EEP LFLRE I CGVEANRKHATEFLLHTCPRSPTGLPAPRRLVFCASTTEEKCVWKNLLEQ--  
: : : : \* : : \* : : : : : : : : : \* : \* \* \* \* : : :
